# Supplementary material for: Magnetically steered cell therapy for reduction of intraocular pressure as a treatment strategy for open-angle glaucoma
Source: eLife. 2025 Jul 7;13:RP103256. doi: 10.7554/eLife.103256 (PMC12234007; doi:10.7554/eLife.103256)
Supplement: Source data 1. [file elife-103256-data1.xlsx]

## Sheet: IOP
Animal	IOP	STD IOP	Group
118	10.5	0.92582	Tg hAMSC Short
118	14.5	0.53452	Tg hAMSC Mid
404	19.4375	1.32645	Tg
119	14.3125	0.83492	WT
120	16.75	1.3887	Tg hAMSC Short
120	13.286	0.95119	Tg hAMSC Mid
120	16.1875	1.2464	Tg
122	12	0.92582	Tg hAMSC Short
122	13.75	1.0351	Tg hAMSC Mid
205	19.3125	2.0991	Tg
492	16.6875	0.84907	WT
124	10.75	0.70711	Tg hAMSC Short
124	10.75	0.70711	Tg hAMSC Mid
403	16.25	0.70711	Tg
200	15.5625	0.63674	WT
135	10.25	2.0529	Tg hAMSC Short
135	10.5	0.75593	Tg hAMSC Mid
402	15.9375	1.26405	Tg Sham Short
402	15.6875	0.973555	Tg Sham Mid
136	14	0.92582	Tg hAMSC Short
136	13.375	0.74402	Tg hAMSC Mid
204	18.625	0.93501	WT
137	13.25	1.669	Tg hAMSC Short
137	13.375	0.51755	Tg hAMSC Mid
208	15.9375	1.5834	WT
139	14.375	0.51755	Tg hAMSC Short
139	13	0.75593	Tg hAMSC Mid
139	17.3958	0.906735	Tg
496	19.25	1.02587	Tg
141	17.5	0.998535	Tg Sham Short
141	19.625	1.19915	Tg Sham Mid
142	17.9375	1.19616	Tg Sham Short
142	17.4375	0.93872	Tg Sham Mid
143	8.375	1.0607	Tg hAMSC Short
143	11.625	1.1877	Tg hAMSC Mid
210	16.25	0.94761	WT
144	12.375	0.91613	Tg hAMSC Short
144	12.571	0.7868	Tg hAMSC Mid
144	13.5625	1.03001	Tg
374	12.5	0.75593	Tg hAMSC Short
374	13.625	1.05205	Tg
401	11.375	0.51755	Tg hAMSC Short
401	13.8125	0.975615	Tg
147	12.125	0.99103	Tg hAMSC Short
147	10.125	0.64087	Tg hAMSC Mid
462	16.875	0.99103	Tg
148	11.625	0.74402	Tg hAMSC Short
148	11.429	0.7868	Tg hAMSC Mid
405	13.9375	1.15255	WT
149	18.125	1.4577	Tg hAMSC Short
149	11.375	1.0607	Tg hAMSC Mid
493	16.6875	1.11161	WT
150	13.5	0.53452	Tg hAMSC Short
150	14.125	0.83452	Tg hAMSC Mid
407	18.0625	1.2863	Tg Sham Short
407	15	1.1584	Tg Sham Mid
251	12.75	1.21425	Tg
152	15.375	0.51755	Tg hAMSC Short
152	15.375	0.51755	Tg hAMSC Mid
408	18.0625	0.854935	WT
153	11	0.75593	Tg hAMSC Short
153	10.75	0.70711	Tg hAMSC Mid
153	17.75	0.975565	Tg
153	15.125	0.83452	Tg hAMSC Long
154	16.375	0.74402	Tg hAMSC Short
154	11.25	1.0351	Tg hAMSC Mid
154	17.0536	1.12505	Tg
154	10.625	1.0607	Tg hAMSC Long
409	12.5	0.75593	Tg hAMSC Long
156	15.375	0.692445	Tg
158	13.5	0.75593	Tg hAMSC Short
158	16.75	1.488	Tg hAMSC Short
158	17.5625	0.68452	Tg
158	14.875	0.83452	Tg hAMSC Long
410	11.75	1.2817	Tg hAMSC Short
159	14.625	1.3025	Tg hAMSC Short
212	14	0.70711	WT
410	11	0.75593	Tg hAMSC Long
159	12.625	0.74402	Tg hAMSC Long
160	13.625	0.78927	WT
161	11.5	0.75593	Tg hAMSC Short
412	18.0625	0.783345	Tg Sham Short
161	10.5	0.75593	Tg hAMSC Long
413	10.125	0.83452	Tg hAMSC Long
414	19.6875	0.94536	Tg Sham Short
162	14.5	0.53452	Tg hAMSC Long
494	17.125	1.55265	WT
164	16.6875	0.725325	WT
415	9	0.92582	Tg hAMSC Short
165	9.375	1.1877	Tg hAMSC Short
165	16.0625	0.99326	Tg
416	13.5	0.53452	Tg hAMSC Short
166	11.5	0.75593	Tg hAMSC Short
417	15.375	2.08305	Tg Sham Short
304	17.25	1.27912	Tg Sham Mid
418	15.5	0.92582	Tg hAMSC Short
167	18.9197	1.3712	Tg Sham Short
167	18	0.90236	Tg Sham Mid
168	17.125	0.912775	WT
213	14.125	0.95358	WT
169	10.75	0.88641	Tg hAMSC Long
495	17.0625	1.15017	WT
170	12	0.75593	Tg hAMSC Long
224	17.1875	1.0975	WT
172	18.0625	0.940965	WT
173	15.5625	0.53033	Tg
174	17.25	0.676035	Tg
174	11.5	0.92582	Tg hAMSC Long
471	18	0.74402	Tg Sham Short
176	14.9375	0.81162	Tg
177	15.75	0.78927	Tg
497	15.875	1.01882	WT
184	15.5625	0.725325	Tg
481	17.125	1.88355	Tg Sham Mid
207	13.25	1.0351	Tg
209	15.625	0.710465	Tg
211	12.8125	0.68452	Tg
461	17.75	0.88641	Tg
461	17.75	0.88641	Tg Sham Long
222	13.875	0.906115	Tg
230	12.125	0.710465	Tg
421	16.5625	0.795225	Tg
421	16	0.75593	Tg Sham Long
457	17.125	0.83452	Tg Sham Long
233	13.1875	0.770815	Tg
236	12.625	0.912775	Tg
451	16.3125	0.87348	Tg
465	15.5	0.645225	Tg
452	14.125	0.710465	Tg Sham Short
240	12.6875	0.815215	Tg
244	11.75	0.70711	Tg
470	15.9375	0.603465	WT
321	12.625	0.710465	WT
247	14.6875	0.67399	WT
460	13.6875	0.68452	WT
248	14.375	0.51755	Tg iPSC Mid
469	14.9375	0.61233	Tg
250	11.8125	0.68452	WT
485	16.125	0.830075	Tg Sham Short
464	15.0625	0.856375	Tg Sham Short
253	14.3125	0.63674	Tg
254	14.25	0.78927	Tg
254	15.25	1.165	Tg iPSC Short
455	15.875	0.83452	Tg Sham Long
454	17	0.75593	Tg Sham Long
466	16.625	0.692445	WT
260	12.5	0.80176	WT
261	12.1875	0.63927	WT
262	18.75	0.73017	WT
269	15	1.1952	Tg iPSC Mid
423	16.5	0.53452	Tg Sham Long
299	14	1.069	Tg iPSC Short
299	14	0.92582	Tg iPSC Mid
310	16.125	0.83452	Tg iPSC Short
310	14	0.92582	Tg iPSC Mid
320	13.5	0.75593	Tg iPSC Short
424	14.75	0.88641	Tg iPSC Short
320	14.75	0.88641	Tg iPSC Mid
323	11.75	0.88641	Tg iPSC Short
327	11.375	1.0607	Tg iPSC Short
327	16.75	1.0351	Tg iPSC Mid
450	14	0.92582	Tg iPSC Short
450	14.5	0.53452	Tg iPSC Mid
342	16.375	0.51755	Tg iPSC Short
346	15.125	0.83452	Tg iPSC Short
349	13.25	1.165	Tg iPSC Short
498	15.75	0.70711	Tg iPSC Short
357	13.75	0.75593	Tg iPSC Short
357	15.75	0.88641	Tg iPSC Mid
378	14.5	0.53452	Tg iPSC Short
379	17.5	0.53452	Tg iPSC Short
392	17	0.75593	Tg iPSC Short
392	14.875	0.99103	Tg iPSC Mid
551	13.125	0.99103	Tg iPSC Short
564	13	0.75593	Tg iPSC Short
565	19.25	0.88641	Tg iPSC Short
566	16.625	1.1877	Tg iPSC Short
568	15.25	0.88641	Tg iPSC Short
569	12.375	0.51755	Tg iPSC Short
575	17	1.069	Tg iPSC Short
578	15	1.069	Tg iPSC Short
468	14.875	0.692445	Tg Sham Mid

## Sheet: Facility
Animal	Facility	Facility 95% CI	Beta	Beta 95% CI	Group
118	5.598	1.081	0.401	0.139	Tg hAMSC Mid
119	8.734	1.038	0.646	0.096	WT
124	8.224	1.084	1.121	0.196	Tg hAMSC Mid
135	11.628	1.018	0.389	0.037	Tg hAMSC Mid
402	6.104	1.046	0.713	0.11	Tg Sham Mid
136	13.011	1.054	0.685	0.183	Tg hAMSC Mid
139	12.733	1.064	0.899	0.108	Tg hAMSC Mid
142	2.405	1.129	0.649	0.211	Tg Sham Mid
144	8.369	1.095	0.63	0.191	Tg hAMSC Mid
120	6.175	1.08	0.953	0.131	Tg hAMSC Mid
147	14.698	1.046	1.316	0.078	Tg hAMSC Mid
405	3.499	1.087	0.934	0.144	WT
149	7.123	1.075	0.84	0.147	Tg hAMSC Mid
150	6.68	1.075	0.486	0.133	Tg hAMSC Mid
407	3.771	1.06	0.13	0.106	Tg Sham Mid
152	6.591	1.083	0.734	0.195	Tg hAMSC Mid
408	4.923	1.067	0.347	0.114	WT
153	8.2	1.06	-0.09	0.17	Tg hAMSC Long
154	6	1.06	0.56	0.27	Tg hAMSC Long
481	2.708	1.068	0.904	0.112	Tg Sham Mid
159	5.234	1.27	0.46	0.427	Tg hAMSC Long
160	5.61	1.242	1.312	0.725	WT
162	12.3	1.134	1.077	0.208	Tg hAMSC Long
164	4.147	1.158	0.071	0.277	WT
492	10.097	1.104	1.444	0.163	WT
165	6.199	1.1	1.515	0.173	Tg hAMSC Short
415	10.741	1.023	1.472	0.043	Tg hAMSC Short
166	14.061	1.054	1.283	0.091	Tg hAMSC Short
416	8.551	1.105	1.37	0.163	Tg hAMSC Short
418	9.071	1.087	1.521	0.138	Tg hAMSC Short
167	2.615	1.106	0.224	0.214	Tg Sham Mid
168	7.543	1.114	0.5	0.191	WT
169	12.1	1.07	0.051	0.41	Tg hAMSC Long
161	8.3	1.07	0.51	0.11	Tg hAMSC Long
421	4.4	1.072	0.4	0.09	Tg Sham Long
172	3.809	1.058	1.184	0.091	WT
173	4.243	1.114	0.049	0.205	Tg
403	4.18	1.044	0.553	0.111	Tg
174	6.7	1.06	1.05	0.23	Tg hAMSC Long
404	5.288	1.038	-0.387	0.075	Tg
176	5.563	1.135	0.416	0.223	Tg
480	4.745	1.088	0.284	0.153	Tg
455	3.046	1.322	-0.1	0.576	Tg Sham Long
466	3.272	1.094	0.9	0.16	WT
141	1.763	1.13			Tg Sham Mid
470	7.303	1.039	0.53	0.068	WT
200	5.229	1.061	0.121	0.16	WT
469	3.406	1.101	0.686	0.166	Tg
468	3.226	1.215	1.391	0.308	Tg Sham Mid
204	3.613	1.044	0.754	0.074	WT
465	3.695	1.161	3.695	1.161	Tg
205	3.289	1.041	0.573	0.069	Tg
464	2.748	1.164	0.756	0.27	Tg Sham Short
462	2.419	1.072	0.453	0.123	Tg
461	5.956	1.085	0.535	0.152	Tg Sham Long
460	4.5	1.061	0.321	0.101	WT
208	2.734	1.061	0.46	0.147	WT
209	2.793	1.121	-0.53	0.252	Tg Sham Long
210	2.967	1.154	0.401	0.261	WT
493	2.178	1.322	0.489	0.493	WT
211	3.186	1.113	0.084	0.211	Tg Sham Long
212	5.083	1.104	0.815	0.171	WT
494	4.355	1.135	0.803	0.251	WT
213	5.499	1.087	0.646	0.172	WT
495	4.235	1.033	0.623	0.066	WT
496	3.305	1.073	0.715	0.127	Tg
214	2.496	1.073	0.48	0.121	Tg
224	3.68	1.052	0.531	0.094	WT
497	3.285	1.071	0.749	0.12	WT
457	3.33	1.17	0.9	0.261	Tg Sham Long
454	3.073	1.216	0.207	0.469	Tg Sham Long
248	3.858	1.231	0.866	0.412	Tg iPSC Mid
251	3.99	1.067		0.113	Tg
269	3.611	1.083	0.807	0.136	Tg iPSC Mid
414	2.894	1.139	0.333	0.234	Tg Sham Short
417	5.048	1.085	0.525	0.166	Tg Sham Short
471	4.72	1.023	0.405	0.057	Tg Sham Short
485	3.183	1.132	-0.055	0.328	Tg Sham Short
451	4.176	1.18	1	0.522	Tg
423	3.307	1.067	0.626	0.111	Tg Sham Long
299	5.67	1.097	-0.397	0.18	Tg iPSC Mid
304	2.8	1.115	0.156	0.214	Tg Sham Long
310	3.459	1.13	0.522	0.213	Tg iPSC Mid
320	5.292	1.127	0.372	0.216	Tg iPSC Mid
321	2.243	1.225	0.823	0.398	WT
357	3.476	1.22	1.426	0.324	Tg iPSC Mid
374	5.972	1.162	1.029	0.251	Tg hAMSC Short
401	6.623	1.128	0.802	0.211	Tg hAMSC Short
450	5.151	1.114	1.193	0.191	Tg iPSC Mid
392	4.476	1.167	0.622	0.276	Tg iPSC Mid
551	4.286	1.096	0.292	0.18	Tg iPSC Short
564	4.34	1.102	-0.1	0.185	Tg iPSC Short
568	3.206	1.183	0.62	0.293	Tg iPSC Short
569	8.05	1.095	0.579	0.162	Tg iPSC Short
575	4.202	1.103	0.761	0.169	Tg iPSC Short
578	3.028	1.228	0.53	0.12	Tg iPSC Short
588	1.896	1.125	0.483	0.216	Tg Sham Short
412	2.697	1.14	0.757	0.241	Tg Sham Short

## Sheet: Cellularity
Animal	Count	Length (um)	Cellularity	Group
118	61	148	0.412162	Tg hAMSC Mid
118	67	146	0.458904	Tg hAMSC Mid
118	52	162	0.320988	Tg hAMSC Mid
404	26	105	0.247619	Tg
404	25	115	0.217391	Tg
404	20	95	0.210526	Tg
120	71	192	0.369792	Tg hAMSC Mid
120	39	121	0.322314	Tg hAMSC Mid
120	34	127	0.267717	Tg hAMSC Mid
124	52	120	0.433333	Tg hAMSC Mid
124	76	164	0.463415	Tg hAMSC Mid
124	53	158	0.335443	Tg hAMSC Mid
403	29	166	0.174699	Tg
403	25	107	0.233645	Tg
135	38	118	0.322034	Tg hAMSC Mid
135	65	173	0.375723	Tg hAMSC Mid
402	32	101	0.316832	Tg Sham Mid
402	24	82	0.292683	Tg Sham Mid
402	21	104	0.201923	Tg Sham Mid
136	66	129	0.511628	Tg hAMSC Mid
136	53	122	0.434426	Tg hAMSC Mid
136	79	202	0.391089	Tg hAMSC Mid
136	68	138	0.492754	Tg hAMSC Mid
142	41	195	0.210256	Tg Sham Mid
142	41	214	0.191589	Tg Sham Mid
143	63	127	0.496063	Tg hAMSC Mid
143	95	170	0.558824	Tg hAMSC Mid
143	73	155	0.470968	Tg hAMSC Mid
144	53	138	0.384058	Tg hAMSC Mid
144	58	132	0.439394	Tg hAMSC Mid
144	57	135	0.422222	Tg hAMSC Mid
147	33	104	0.317308	Tg hAMSC Mid
147	42	136	0.308824	Tg hAMSC Mid
147	36	110	0.327273	Tg hAMSC Mid
153	37	87	0.425287	Tg hAMSC Long
153	62	168	0.369048	Tg hAMSC Long
153	38	120	0.316667	Tg hAMSC Long
154	37	99	0.373737	Tg hAMSC Long
154	46	106	0.433962	Tg hAMSC Long
480	27	101	0.267327	Tg
480	25	80	0.3125	Tg
481	41	204	0.20098	Tg Sham Mid
481	38	146	0.260274	Tg Sham Mid
481	31	130	0.238462	Tg Sham Mid
481	21	83	0.253012	Tg Sham Mid
159	40	124	0.322581	Tg hAMSC Long
159	45	130	0.346154	Tg hAMSC Long
161	57	140	0.407143	Tg hAMSC Long
161	67	130	0.515385	Tg hAMSC Long
162	31	88	0.352273	Tg hAMSC Long
162	36	110	0.327273	Tg hAMSC Long
165	90	117	0.769231	Tg hAMSC Short
165	79	164	0.481707	Tg hAMSC Short
165	57	92	0.619565	Tg hAMSC Short
165	82	164	0.5	Tg hAMSC Short
165	83	194	0.427835	Tg hAMSC Short
415	142	178	0.797753	Tg hAMSC Short
415	84	148	0.567568	Tg hAMSC Short
415	82	173	0.473988	Tg hAMSC Short
415	47	90	0.522222	Tg hAMSC Short
166	88	125	0.704	Tg hAMSC Short
166	83	180	0.461111	Tg hAMSC Short
166	81	150	0.54	Tg hAMSC Short
166	83	177	0.468927	Tg hAMSC Short
166	74	130	0.569231	Tg hAMSC Short
416	99	139	0.71223	Tg hAMSC Short
416	98	124	0.790323	Tg hAMSC Short
416	78	109	0.715596	Tg hAMSC Short
418	71	170	0.417647	Tg hAMSC Short
418	73	132	0.55303	Tg hAMSC Short
418	91	193	0.471503	Tg hAMSC Short
167	43	167	0.257485	Tg Sham Mid
167	57	151	0.377483	Tg Sham Mid
167	34	135	0.251852	Tg Sham Mid
167	32	132	0.242424	Tg Sham Mid
167	30	134	0.223881	Tg Sham Mid
168	51	170	0.3	WT
168	31	150	0.206667	WT
168	31	135	0.22963	WT
168	26	110	0.236364	WT
168	32	120	0.266667	WT
168	23	135	0.17037	WT
168	33	130	0.253846	WT
169	31	95	0.326316	Tg hAMSC Long
169	51	161	0.31677	Tg hAMSC Long
169	32	88	0.363636	Tg hAMSC Long
173	32	130	0.246154	Tg
173	37	136	0.272059	Tg
173	37	130	0.284615	Tg
173	35	128	0.273438	Tg
452	26	117	0.222222	Tg Sham Short
452	27	143	0.188811	Tg Sham Short
452	24	100	0.24	Tg Sham Short
452	34	167	0.203593	Tg Sham Short
471	28	136	0.205882	Tg Sham Short
471	21	92	0.228261	Tg Sham Short
471	33	148	0.222973	Tg Sham Short
176	38	142	0.267606	Tg
176	36	130	0.276923	Tg
176	37	146	0.253425	Tg
470	21	140	0.15	WT
470	33	125	0.264	WT
470	37	151	0.245033	WT
470	28	120	0.233333	WT
469	50	178	0.280899	Tg
469	26	112	0.232143	Tg
469	32	102	0.313725	Tg
468	27	146	0.184932	Tg Sham Mid
468	36	180	0.2	Tg Sham Mid
466	42	163	0.257669	WT
466	27	145	0.186207	WT
466	34	125	0.272	WT
466	22	125	0.176	WT
465	39	179	0.217877	Tg
465	38	150	0.253333	Tg
465	36	155	0.232258	Tg
465	32	135	0.237037	Tg
464	51	190	0.268421	Tg Sham Short
464	38	134	0.283582	Tg Sham Short
464	30	110	0.272727	Tg Sham Short
462	33	163	0.202454	Tg
462	26	100	0.26	Tg
462	39	211	0.184834	Tg
461	18	107	0.168224	Tg Sham Long
461	26	110	0.236364	Tg Sham Long
461	25	116	0.215517	Tg Sham Long
460	42	104	0.4
460	60	155	0.387097	WT
417	23	71	0.323944	Tg Sham Short
417	29	95	0.305263	Tg Sham Short
417	39	140	0.278571	Tg Sham Short
214	32	118	0.271186	Tg
214	87	185	0.47027	Tg
214	90	203	0.44335	Tg
214	60	140	0.428571	Tg
421	15	85	0.176471	Tg Sham Long
421	23	100	0.23	Tg Sham Long
421	25	98	0.255102	Tg Sham Long
457	35	124	0.282258	Tg Sham Long
457	29	98	0.295918	Tg Sham Long
457	18	90	0.2	Tg Sham Long
423	44	165	0.266667	Tg Sham Long
423	45	155	0.290323	Tg Sham Long
423	29	185	0.156757	Tg Sham Long
423	26	143	0.181818	Tg Sham Long
454	13	74	0.175676	Tg Sham Long
454	21	82	0.256098	Tg Sham Long
454	20	80	0.25	Tg Sham Long
248	21	106	0.198113	Tg iPSC Mid
248	32	113	0.283186	Tg iPSC Mid
248	61	185	0.32973	Tg iPSC Mid
269	46	152	0.302632	Tg iPSC Mid
269	40	150	0.266667	Tg iPSC Mid
269	50	190	0.263158	Tg iPSC Mid
485	56	138	0.405797	Tg Sham Short
485	46	160	0.2875	Tg Sham Short
485	38	120	0.316667	Tg Sham Short
451	62	177	0.350282	Tg
451	40	134	0.298507	Tg
451	29	102	0.284314	Tg
451	22	70	0.314286	Tg
299	40	123	0.325203	Tg iPSC Mid
299	40	94	0.425532	Tg iPSC Mid
299	45	97	0.463918	Tg iPSC Mid
320	33	93	0.354839	Tg iPSC Mid
320	50	123	0.406504	Tg iPSC Mid
320	53	164	0.323171	Tg iPSC Mid
450	63	105	0.6	Tg iPSC Mid
450	53	100	0.53	Tg iPSC Mid
450	65	111	0.585586	Tg iPSC Mid
392	31	138	0.224638	Tg iPSC Mid
392	22	122	0.180328	Tg iPSC Mid
392	31	182	0.17033	Tg iPSC Mid
392	34	103	0.330097	Tg iPSC Mid
392	53	174	0.304598	Tg iPSC Mid
551	55	123	0.447154	Tg iPSC Short
551	48	122	0.393443	Tg iPSC Short
551	51	188	0.271277	Tg iPSC Short
568	38	135	0.281481	Tg iPSC Short
568	58	149	0.389262	Tg iPSC Short
569	34	90	0.377778	Tg iPSC Short
569	39	107	0.364486	Tg iPSC Short
575	49	110	0.445455	Tg iPSC Short
575	47	137	0.343066	Tg iPSC Short
575	59	133	0.443609	Tg iPSC Short
575	30	97	0.309278	Tg iPSC Short
578	43	94	0.457447	Tg iPSC Short
578	44	155	0.283871	Tg iPSC Short
578	39	146	0.267123	Tg iPSC Short

## Sheet: CellvIOP
Animal	IOP	Cellularity	Group
118	14.5	0.397351	Tg hAMSC Mid
404	19.4375	0.225179	Tg
120	13.286	0.319941	Tg hAMSC Mid
124	10.75	0.41073	Tg hAMSC Mid
403	16.25	0.204172	Tg
135	10.5	0.348878	Tg hAMSC Mid
402	15.6875	0.270479	Tg Sham Mid
136	13.375	0.457474	Tg hAMSC Mid
142	17.4375	0.200923	Tg Sham Mid
143	11.625	0.508618	Tg hAMSC Mid
144	12.571	0.415225	Tg hAMSC Mid
147	10.125	0.317801	Tg hAMSC Mid
153	15.125	0.370334	Tg hAMSC Long
154	10.625	0.40385	Tg hAMSC Long
481	17.5625	0.255426	Tg Sham Mid
159	12.625	0.334367	Tg hAMSC Long
161	10.5	0.461264	Tg hAMSC Long
162	14.5	0.339773	Tg hAMSC Long
165	9.375	0.559668	Tg hAMSC Short
415	9	0.590383	Tg hAMSC Short
166	11.5	0.548654	Tg hAMSC Short
416	13.5	0.739383	Tg hAMSC Short
418	15.5	0.480727	Tg hAMSC Short
167	18	0.270625	Tg Sham Mid
168	17.125	0.237649	WT
169	10.75	0.335574	Tg hAMSC Long
173	15.25	0.269066	Tg
452	15.875	0.213657	Tg Sham Short
471	18	0.219039	Tg Sham Short
176	14.9375	0.265984	Tg
470	15.9375	0.223092	WT
469	14.6875	0.275589	Tg
468	13.25	0.192466	Tg Sham Mid
466	16.625	0.222969	WT
465	15.5	0.235126	Tg
464	16.375	0.27491	Tg Sham Short
462	16.875	0.215763	Tg
461	17.75	0.206702	Tg Sham Long
460	13.6875	0.387097	WT
417	15.375	0.302593	Tg Sham Short
421	16	0.220524	Tg Sham Long
457	17.125	0.259392	Tg Sham Long
423	16.5	0.223891	Tg Sham Long
454	17	0.227258	Tg Sham Long
248	14.375	0.270343	Tg iPSC Mid
269	15	0.277485	Tg iPSC Mid
485	16.125	0.336655	Tg Sham Short
451	16.3125	0.311847	Tg
299	14	0.404884	Tg iPSC Mid
320	14.75	0.361505	Tg iPSC Mid
450	14.5	0.571862	Tg iPSC Mid
392	14.875	0.241998	Tg iPSC Mid
551	13.125	0.370625	Tg iPSC Short
568	15.25	0.335372	Tg iPSC Short
569	12.375	0.371132	Tg iPSC Short
575	17	0.385352	Tg iPSC Short
578	15	0.336147	Tg iPSC Short

## Sheet: ExperimentalVsExpectedIOP
Group	Mean Experimental IOP (mmHg)	Experimental IOP 95% CI (± mmHg)	Mean Expected IOP (mmHg)	Expected IOP 95% CI (± mmHg)
WT	15.6	0.8	NA	NA
Tg	15.4	0.7	17.0153	1.56705
Tg Sham Short	17.1	1.1	18.2251	2.531
Tg hAMSC Short	12.8	0.9	14.1084	1.81765
Tg Sham Mid	16.9	1.4	18.3446	3.39194
Tg hAMSC Mid	12.4	0.8	13.3236	1.69442
Tg Sham Long	16.7	0.7	17.8979	2.48595
Tg hAMSC Long	12.2	1.2	13.1317	2.98791
Tg iPSC Short	14.8	0.8	16.309	1.46383
Tg iPSC Mid	15	0.7	16.1616	1.16505

## Sheet: ECM Turnover
Animal	Section	BMM Norm	Group	Annotator
135	1	0.351788	Tg hAMSC Mid	A
135	2	0.28885	Tg hAMSC Mid	A
135	3	0.224458	Tg hAMSC Mid	A
135	4	0.244939	Tg hAMSC Mid	A
135	5	0.273349	Tg hAMSC Mid	A
135	6	0.451902	Tg hAMSC Mid	A
136	7	0.411441	Tg hAMSC Mid	A
136	8	0.312409	Tg hAMSC Mid	A
136	9	0.339972	Tg hAMSC Mid	A
136	10	0.340682	Tg hAMSC Mid	A
136	11	0.318094	Tg hAMSC Mid	A
136	12	0.475448	Tg hAMSC Mid	A
139	13	0.277778	Tg hAMSC Mid	A
139	14	0.36918	Tg hAMSC Mid	A
139	15	0.393426	Tg hAMSC Mid	A
147	16	0.172538	Tg hAMSC Mid	A
147	17	0.291285	Tg hAMSC Mid	A
147	18	0.397462	Tg hAMSC Mid	A
147	19	0.405588	Tg hAMSC Mid	A
402	20	0.645177	Tg Sham Mid	A
402	21	0.390292	Tg Sham Mid	A
402	22	0.498156	Tg Sham Mid	A
402	23	0.47283	Tg Sham Mid	A
402	24	0.574431	Tg Sham Mid	A
142	25	0.497459	Tg Sham Mid	A
142	26	0.456957	Tg Sham Mid	A
142	27	0.508741	Tg Sham Mid	A
142	28	0.524486	Tg Sham Mid	A
142	29	0.381381	Tg Sham Mid	A
142	30	0.496697	Tg Sham Mid	A
167	31	0.500244	Tg Sham Mid	A
167	32	0.544624	Tg Sham Mid	A
167	33	0.645516	Tg Sham Mid	A
167	34	0.314727	Tg Sham Mid	A
167	35	0.461943	Tg Sham Mid	A
468	36	0.759678	Tg Sham Mid	A
468	37	0.706356	Tg Sham Mid	A
468	38	0.629563	Tg Sham Mid	A
468	39	0.598222	Tg Sham Mid	A
468	40	0.61102	Tg Sham Mid	A
468	41	0.532609	Tg Sham Mid	A
135	42	0.358833	Tg hAMSC Mid	B
135	43	0.360766	Tg hAMSC Mid	B
135	44	0.361212	Tg hAMSC Mid	B
135	45	0.244939	Tg hAMSC Mid	B
135	46	0.273349	Tg hAMSC Mid	B
135	47	0.477062	Tg hAMSC Mid	B
136	48	0.507672	Tg hAMSC Mid	B
136	49	0.302198	Tg hAMSC Mid	B
136	50	0.298495	Tg hAMSC Mid	B
136	51	0.379356	Tg hAMSC Mid	B
136	52	0.252102	Tg hAMSC Mid	B
136	53	0.441245	Tg hAMSC Mid	B
139	54	0.314685	Tg hAMSC Mid	B
139	55	0.330215	Tg hAMSC Mid	B
139	56	0.406963	Tg hAMSC Mid	B
147	57	0.211197	Tg hAMSC Mid	B
147	58	0.291285	Tg hAMSC Mid	B
147	59	0.356947	Tg hAMSC Mid	B
147	60	0.518309	Tg hAMSC Mid	B
402	61	0.645177	Tg Sham Mid	B
402	62	0.34255	Tg Sham Mid	B
402	63	0.404163	Tg Sham Mid	B
402	64	0.417704	Tg Sham Mid	B
402	65	0.476479	Tg Sham Mid	B
142	66	0.499843	Tg Sham Mid	B
142	67	0.436603	Tg Sham Mid	B
142	68	0.435357	Tg Sham Mid	B
142	69	0.593788	Tg Sham Mid	B
142	70	0.320776	Tg Sham Mid	B
142	71	0.405204	Tg Sham Mid	B
167	72	0.479506	Tg Sham Mid	B
167	73	0.469467	Tg Sham Mid	B
167	74	0.645516	Tg Sham Mid	B
167	75	0.314727	Tg Sham Mid	B
167	76	0.571482	Tg Sham Mid	B
468	77	0.745651	Tg Sham Mid	B
468	78	0.651223	Tg Sham Mid	B
468	79	0.506725	Tg Sham Mid	B
468	80	0.608657	Tg Sham Mid	B
468	81	0.773509	Tg Sham Mid	B
468	82	0.418737	Tg Sham Mid	B
